# Supplementary material
Source: MDPI journal article supplement (https://www.mdpi.com/2076-3417/12/3/1586)
Supplement: s1 [file s1]

# Effects of tin and sulfur chemical substitution on the structural and electrical properties of CuCr<sub>2</sub>Se<sub>4</sub> selenospinel

Paulina Valencia-Gálvez <sup>1</sup>, Daniel Aravena <sup>2</sup>, Patricia Barahona<sup>3</sup>, Silvana Moris <sup>4,\*</sup> and Antonio Galdámez <sup>1,\*</sup>

<sup>1</sup> Departamento de Química, Facultad de Ciencias, Universidad+ de Chile, Las Palmeras 3425, Chile; paulygav@uchile.cl (P.V-G.)

<sup>2</sup> Departamento de Química de los Materiales, Facultad de Química y Biología, Universidad de Santiago de Chile, Casilla 40, Correo 33, Santiago 9170022, Chile; daniel.aravena.p@usach.cl (D. A.)

<sup>3</sup> Facultad de Ciencias Básicas, Universidad Católica del Maule, Talca, Chile (P.B.)

<sup>4</sup> Centro de Investigación de Estudios Avanzados del Maule (CIEAM), Vicerrectoría de Investigación y Postgrado, Universidad Católica del Maule, Avenida San Miguel 3605, Talca 3480112, Chile

\* Correspondence: [smoris@ucm.cl](mailto:smoris@ucm.cl) (S.M.); [agaldamez@uchile.cl](mailto:agaldamez@uchile.cl) (A.G.)

## Supplementary Materials

**Table S1.** Fractional atomic coordinates and isotropic or equivalent isotropic displacement parameters (Å<sup>2</sup>)

|    | <i>x</i> | <i>y</i> | <i>z</i> | <i>U</i> <sub>iso</sub> <sup>*</sup> / <i>U</i> <sub>eq</sub> | Occ. (<1) |
|----|----------|----------|----------|---------------------------------------------------------------|-----------|
| Cu | 1/8      | 1/8      | 1/8      | 0.0174                                                        |           |
| Sn | 1/4      | 3/4      | 1/2      | 0.0034                                                        | 0.435     |
| Cr | 1/4      | 3/4      | 1/2      | 0.0034                                                        | 0.565     |
| Se | 0.25484  | 0.99516  | 0.49516  | 0.0066                                                        | 0.432     |
| S  | 0.25484  | 0.99516  | 0.49516  | 0.0066                                                        | 0.568     |

\* *U*<sub>eq</sub> is defined as one third of the trace of the orthogonalized *U*<sub>ij</sub> tensor. Cu in 8a site; Cr/ Sn in 16d site and S/Se in 32e site.

**Table S2.** Frequency and proposed mode assignment of Raman peaks.

| mode                | CuCrSnS <sub>4</sub> <sup>[7]</sup> | CuCr <sub>1.6</sub> Sn <sub>0.4</sub> S <sub>2</sub> Se <sub>2</sub> <sup>[12]</sup> | CuCrSnS <sub>2</sub> Se <sub>2</sub> <sup>[12]</sup> | *CuCr <sub>1.6</sub> Sn <sub>0.4</sub> S <sub>2.3</sub> Se <sub>1.7</sub> | *CuCrSnS <sub>2.3</sub> Se <sub>1.7</sub> |
|---------------------|-------------------------------------|--------------------------------------------------------------------------------------|------------------------------------------------------|---------------------------------------------------------------------------|-------------------------------------------|
| F <sub>2g</sub> (1) | 130                                 | 133                                                                                  | 124                                                  | 128                                                                       | 119                                       |
| E <sub>g</sub>      | 165                                 | 194                                                                                  | ----                                                 | 205                                                                       | 202                                       |
| F <sub>2g</sub> (2) | 299                                 | 299                                                                                  | 295                                                  | 300                                                                       | 236                                       |
| F <sub>2g</sub> (3) | 337                                 | 337                                                                                  | 338                                                  | 339                                                                       | 255                                       |
| A <sub>1g</sub>     | 379                                 | 382                                                                                  | ---                                                  | 382                                                                       | 335                                       |

\*This work

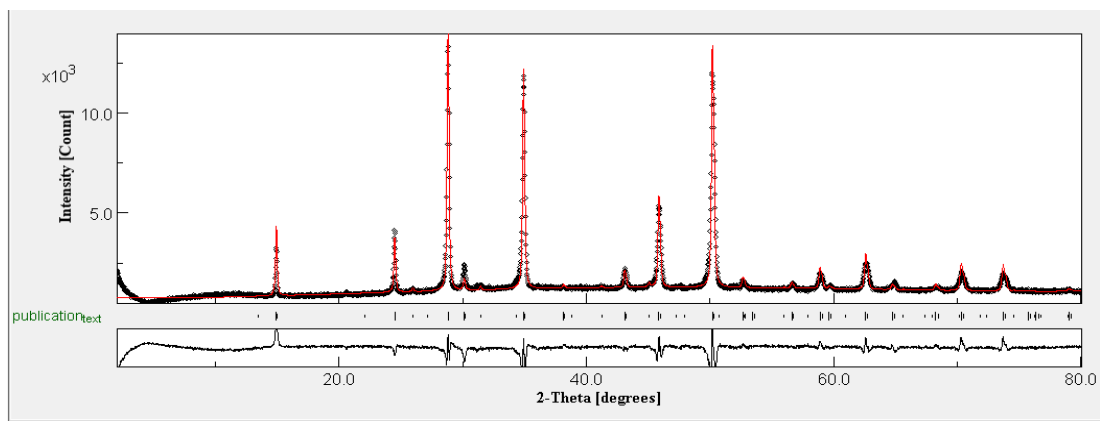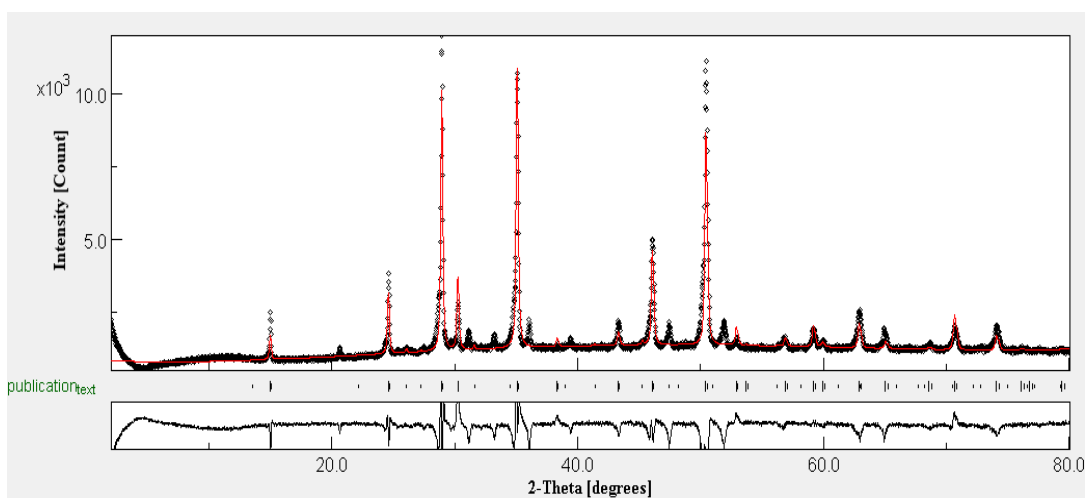

**Figure S1.** Representative powder XRD data for  $\text{CuCr}_{1.4}\text{Sn}_{0.6}\text{S}_{2.3}\text{Se}_{1.7}$  (top) and  $\text{CuCr}_{1.6}\text{Sn}_{0.4}\text{S}_{2.3}\text{Se}_{1.7}$  (bottom) including profile fit, profile difference, and profile residuals from the corresponding Rietveld refinement using MAUD program. The intensities are plotted as the intensity \*Q to show low-intensity reflections as well.

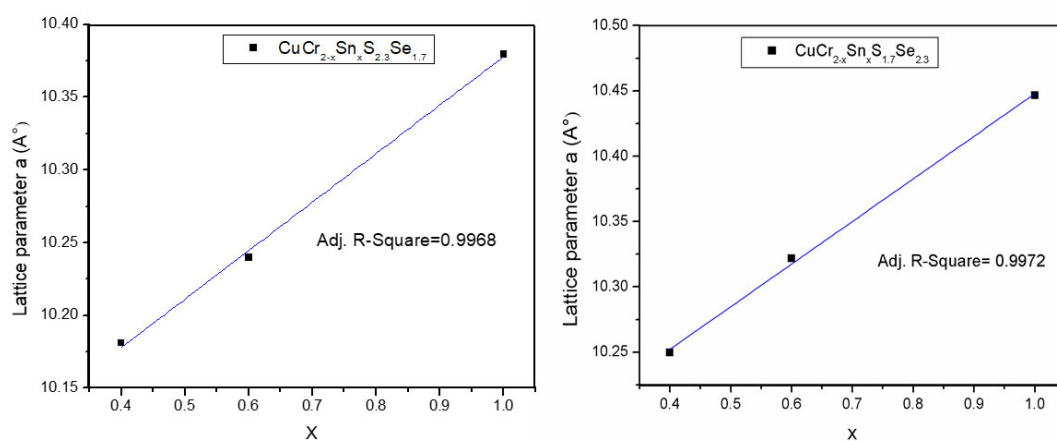

**Figure S2.** Vegard's Law for  $\text{CuCr}_{2-x}\text{Sn}_x\text{S}_{2.3}\text{Se}_{1.7}$  and  $\text{CuCr}_{2-x}\text{Sn}_x\text{S}_{1.7}\text{Se}_{2.3}$  ( $x = 0.4; 0.6$  y  $1.0$ ) phases.

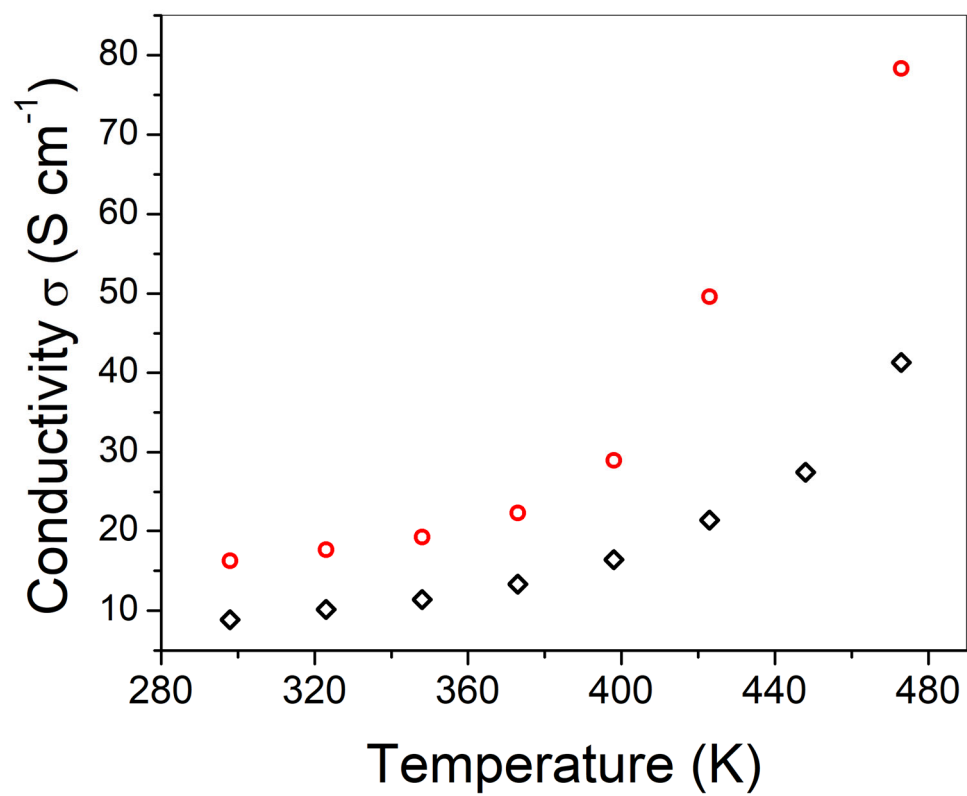

**Figure S3.** Electrical conductivity against Temperature of  $\text{CuCr}_{2-x}\text{Sn}_x\text{S}_{2.3}\text{Se}_{1.7}$   $x = 0.4$  (red circles) and 0.6 (black diamonds) phases.

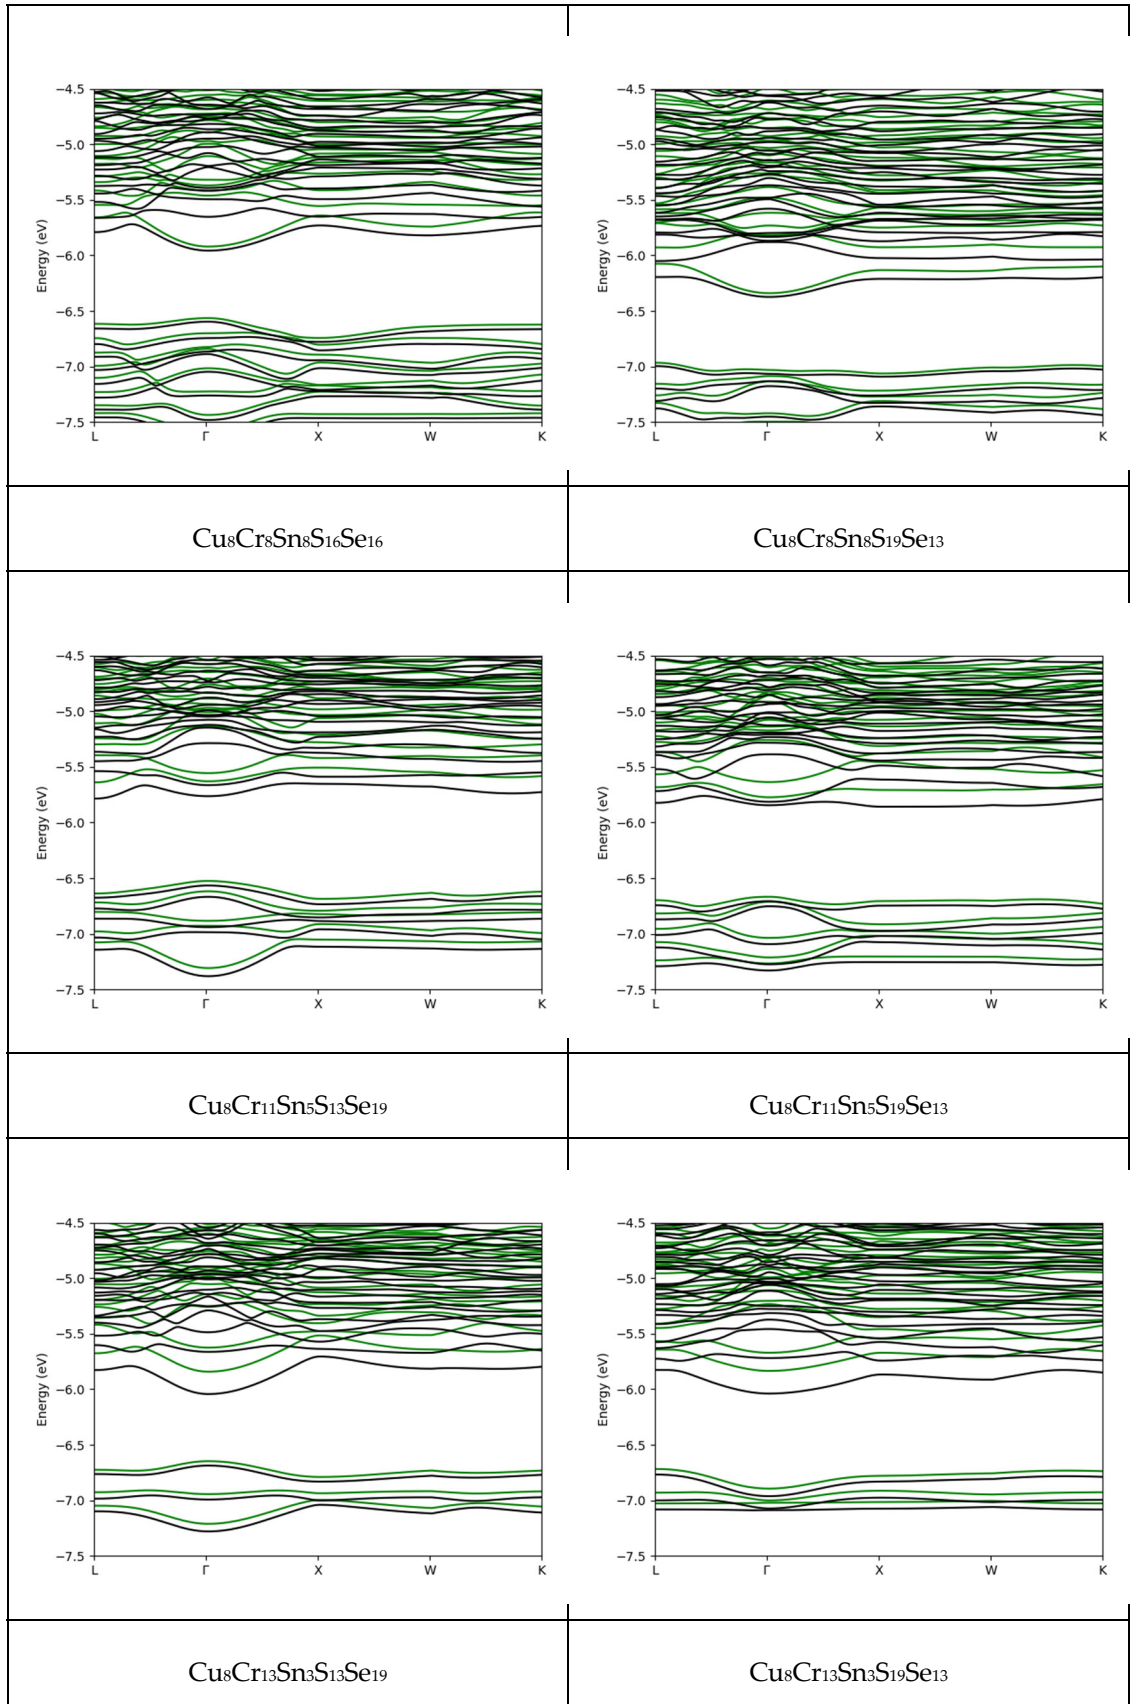

**Figure S4.** Band structures for calculated models. Alpha bands are depicted in black and beta bands are presented in green.

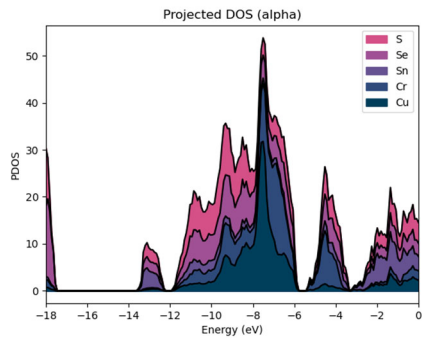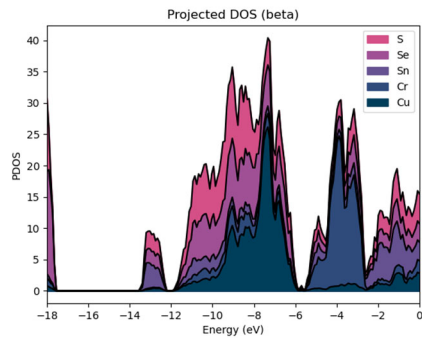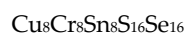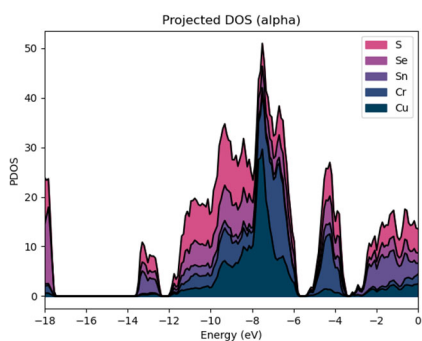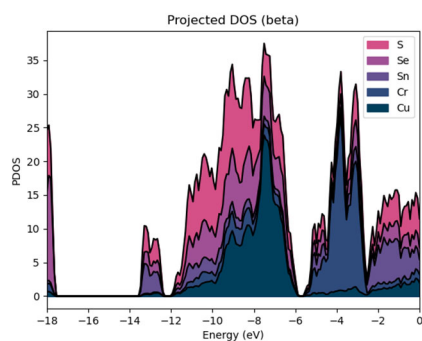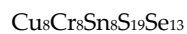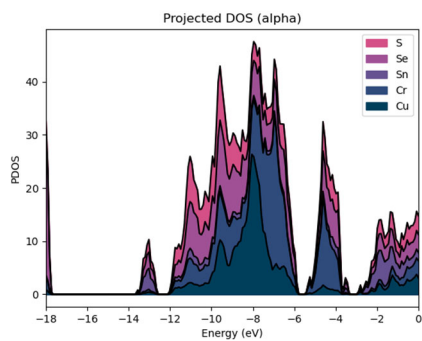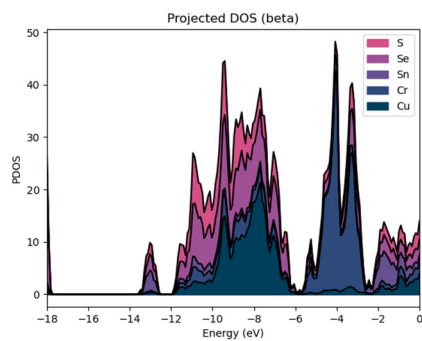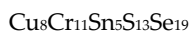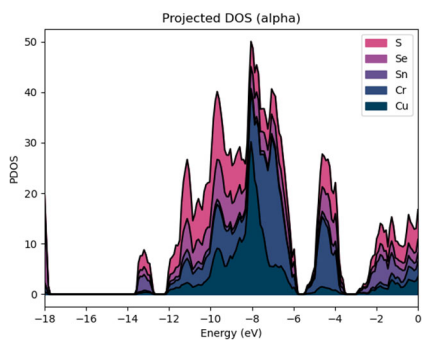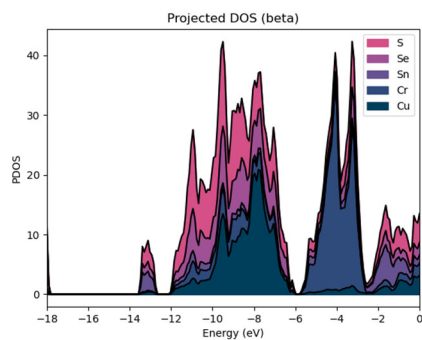

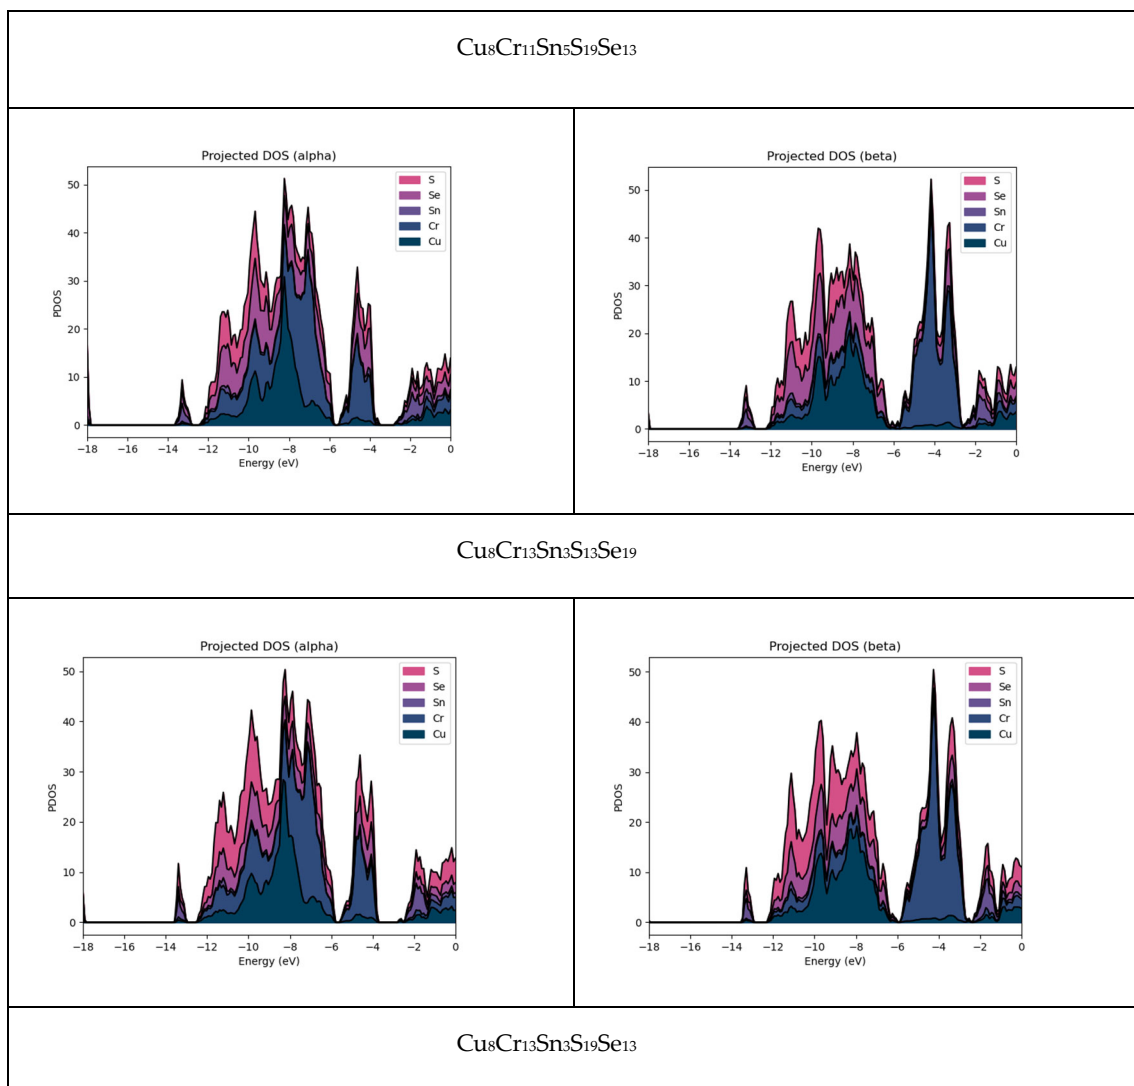

**Figure S5** Element and spin resolved Density of states for all calculated systems.

**Supplementary Materials:** The following materials are available online at [www.mdpi.com/xxx/s1](http://www.mdpi.com/xxx/s1). Table S1: Fractional atomic coordinates and isotropic or equivalent isotropic displacement parameters ; Figure S1: Representative powder XRD data for  $\text{CuCr}_{1.0}\text{Sn}_{1.0}\text{S}_{2.3}\text{Se}_{1.7}$ ; Figure S2. Vegard's Law; Figure S3: Electrical conductivity against Temperature of  $\text{CuCr}_{2-x}\text{Sn}_x\text{S}_{2.3}\text{Se}_{1.7}$ ; Figure S4. Band structures for calculated models. Alpha bands are depicted in black and beta bands are presented in green; Figure S5: Element and spin resolved Density of states for all calculated systems.

**Author Contributions:** conceptualization, A.G. and S.M.; methodology and experiments, P.V.G., P.B., A.G., and S.M.; writing—original draft preparation, S.M., P.V-G., D.A., and A.G.; electrical measurements, A.G. and P.V-G; DFT calculations, D.A. All authors have read and agreed to the final version of the manuscript.

**Funding:** This research received no external funding.

**Acknowledgments:** This work was supported by the Chilean-French International Associated Laboratory for 'Multifunctional Molecules and Materials' (LIAM3-CNRS N°1027). The authors also thank to FONDEQUIP grant EQM140142 for Raman Witec Alpha 300 equipment and the Unidad de Equipamiento Científico "MAINI-UCN" of the Universidad Católica del Norte for the generation of diffuse reflectance spectroscopy data through the FONDEQUIP UV-VIS-NIR grant EQM160120. I am also (A.G.) deeply grateful for the scientific collaboration, friendliness and willingness to support me in an unselfish disposition of Professors Carlos Pico and María Luisa Veiga.

**Conflicts of Interest:** The authors declare no conflicts of interest.

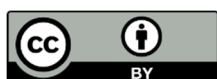

© 2021 by the authors. Submitted for possible open access publication under the terms and conditions of the Creative Commons Attribution (CC BY) license (<http://creativecommons.org/licenses/by/4.0/>).
